# Supplementary material for: Initial Multitarget Approach Shows Importance for Improved Caprine Arthritis-encephalitis Virus Control Program in Russia for Hobbyist Goat Farms
Source: Preprints.org preprint supplement (doi:10.20944/preprints202009.0270.v1), 2020-09-12
Supplement: Supplementary file 1 [file supplementary]

Associated Data

Data supplied by the author:

Data is available at FigShare, accession numbers: 12423866, 12423863, 12423854, 12423857,

12423845, 12423869, 12423860, 12423848, 12423923, 12581261.

Link:

<https://figshare.com/authors/Nail_Khammadov/8932139>

links to raw data:

https://figshare.com/articles/Table_2_IDEXX_ELISA_xlsx/12423866

https://figshare.com/articles/Table_2_PCR_blood_F1_-_Quantification_Summary_xlsx/12423863

https://figshare.com/articles/Table_2_PCR_blood_F2_-_Quantification_Summary_xlsx/12423854

https://figshare.com/articles/Table_2_PCR_blood_F3_-_Quantification_Summary_xlsx/12423857

https://figshare.com/articles/Table_2_PCR_milk_F1_-_Quantification_Summary_xlsx/12423845

https://figshare.com/articles/Table_2_PCR_milk_F2_-_Quantification_Summary_xlsx/12423869

https://figshare.com/articles/Table_2_PCR_milk_F3_-_Quantification_Summary_xlsx/12423860

https://figshare.com/articles/Fig_S2_plasmid_titration_-_Quantification_Summary_xlsx/12423848

<https://figshare.com/articles/Fig_S3_Milk_titration_Quantification_Summary_xlsx/12423923>

<https://figshare.com/articles/RT-PCR_all_data/12581261>
